# Supplementary material
Source: PubMed Central journal article supplement (PMC3921595)

## Sandow et al. Supplementary Figure 1

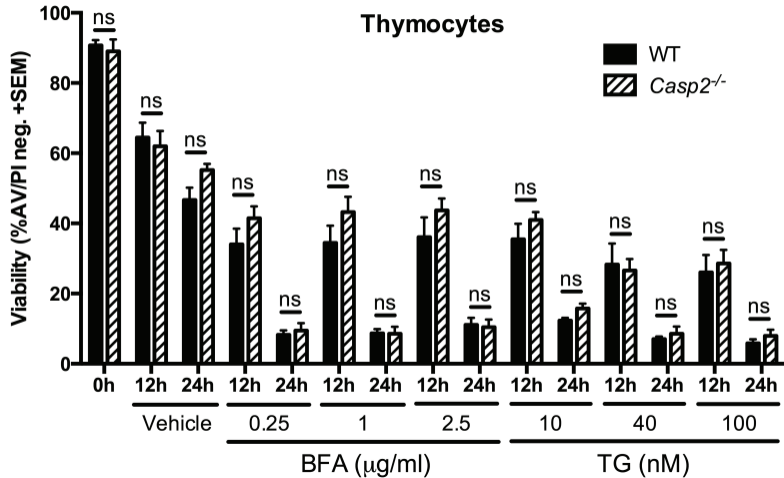

Supplement: cdd2013168x1.pdf [file cdd2013168x1.pdf]

# Sadow et al. Supplementary Figure 2

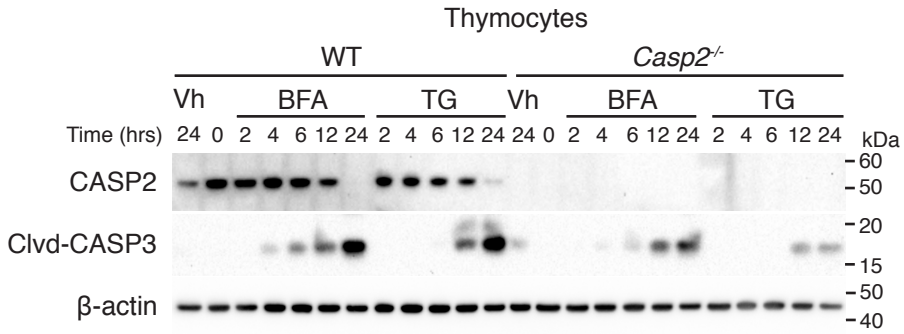

Supplement: cdd2013168x2.pdf [file cdd2013168x2.pdf]
